# Supplementary material
Source: PubMed Central journal article supplement (PMC10008634)
Supplement: 43856_2023_266_MOESM1_ESM.pdf [file 43856_2023_266_MOESM1_ESM.pdf]

## **Description of Additional Supplementary Files**

**File Name:** Supplementary Data 1

**Description:** Data to reproduce Figure 1

**File Name:** Supplementary Data 2

**Description:** Data to reproduce Figures 2a and 2b

**File Name:** Supplementary Data 3

**Description:** Data to reproduce Figure 3
