# Supplementary material
Source: PubMed Central journal article supplement (PMC10008634)
Supplement: 43856_2023_266_MOESM2_ESM.pdf [file 43856_2023_266_MOESM2_ESM.pdf]

# Supplementary Information

Persistent COVID-19 symptoms in community-living older adults from the Canadian Longitudinal Study on Aging (CLSA)

Lauren E. Griffith, PhD<sup>1,2,3</sup>

Marla Beauchamp, PhD<sup>4,2,3</sup>

Jacqueline McMillan, MD MSc<sup>5</sup>

Sayem Borhan, PhD<sup>1</sup>

Urun Erbas Oz, PhD<sup>1</sup>

Christina Wolfson, PhD<sup>6,7,8</sup>

Susan Kirkland, PhD<sup>9</sup>

Nicole E. Basta, PhD<sup>6</sup>

Mary Thompson, PhD<sup>10</sup>

Parminder Raina, PhD<sup>1,2,3</sup>

on behalf of the Canadian Longitudinal Study on Aging (CLSA) Team\*

## Affiliations:

<sup>1</sup>Department of Health Research Methods, Evidence, and Impact, McMaster University, Hamilton, Canada

<sup>2</sup>Labarge Centre for Mobility in Aging, McMaster University, Hamilton, Ontario, Canada

<sup>3</sup>McMaster Institute for Research on Aging, McMaster University, Hamilton, Ontario, Canada

<sup>4</sup>School of Rehabilitation Science, McMaster University, Hamilton, Ontario, Canada

<sup>5</sup>Division of Geriatric Medicine, Department of Medicine, Cumming School of Medicine, University of Calgary, Calgary, AB, Canada

<sup>6</sup>Department of Epidemiology, Biostatistics, and Occupational Health, McGill University, Montreal, Quebec, Canada

<sup>7</sup>Department of Medicine, McGill University, Montreal, Quebec, Canada

<sup>8</sup>Research Institute of the McGill University Health Centre, Quebec, Canada

<sup>9</sup>Department of Community Health & Epidemiology, Dalhousie University, Halifax, Nova Scotia, Canada

<sup>10</sup>Department of Statistics and Actuarial Science, University of Waterloo, Waterloo, Ontario, Canada.

\* A list of authors and their affiliations appears at the end of the paper.

Supplementary Figure 1. Cumulative incidence (percent) of mild (dark blue) and moderate/severe (light blue) symptoms since March 2020 reported by CLSA COVID-19 study participant who had COVID-19 (n=121) and who did not have COVID-19 (n=23,636). The COVID-19 group is standardized to reflect the age-, sex- and multimorbidity-distribution of the non-COVID-19 group

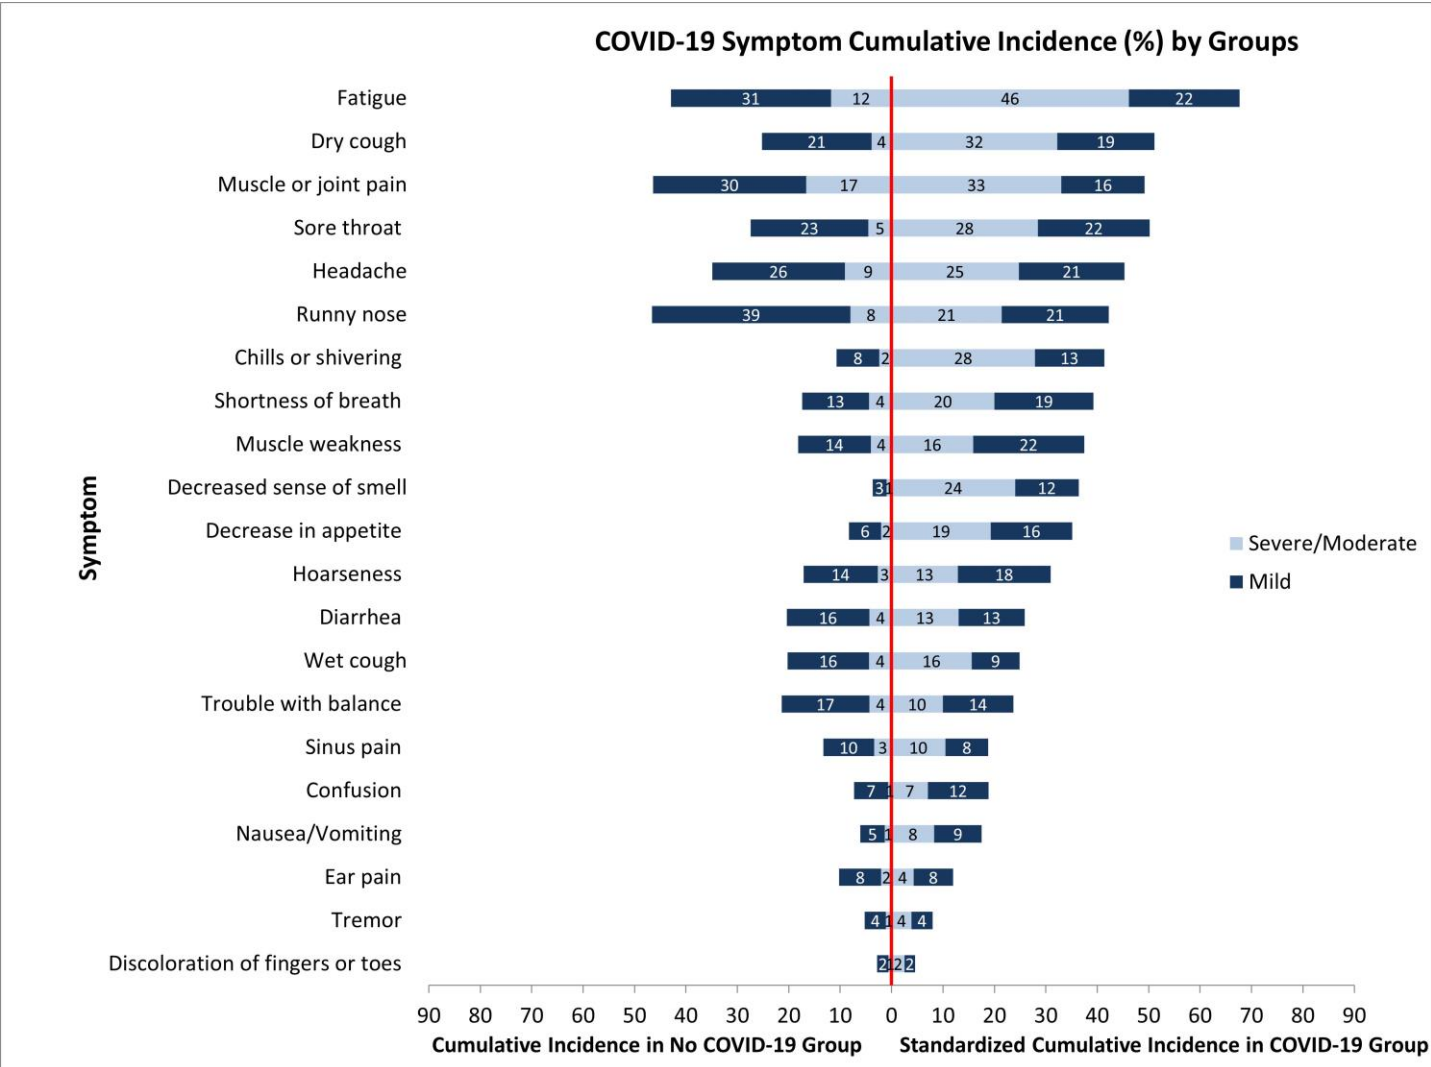

Supplementary Figure 2a-c. Cumulative Incidence percent of mild (dark blue) and moderate/severe (light blue) symptoms since March 2020 reported by non-COVID-19 and COVID-19 participant age <65 (2a), 65-74 (2b) and 75+ (2c) years

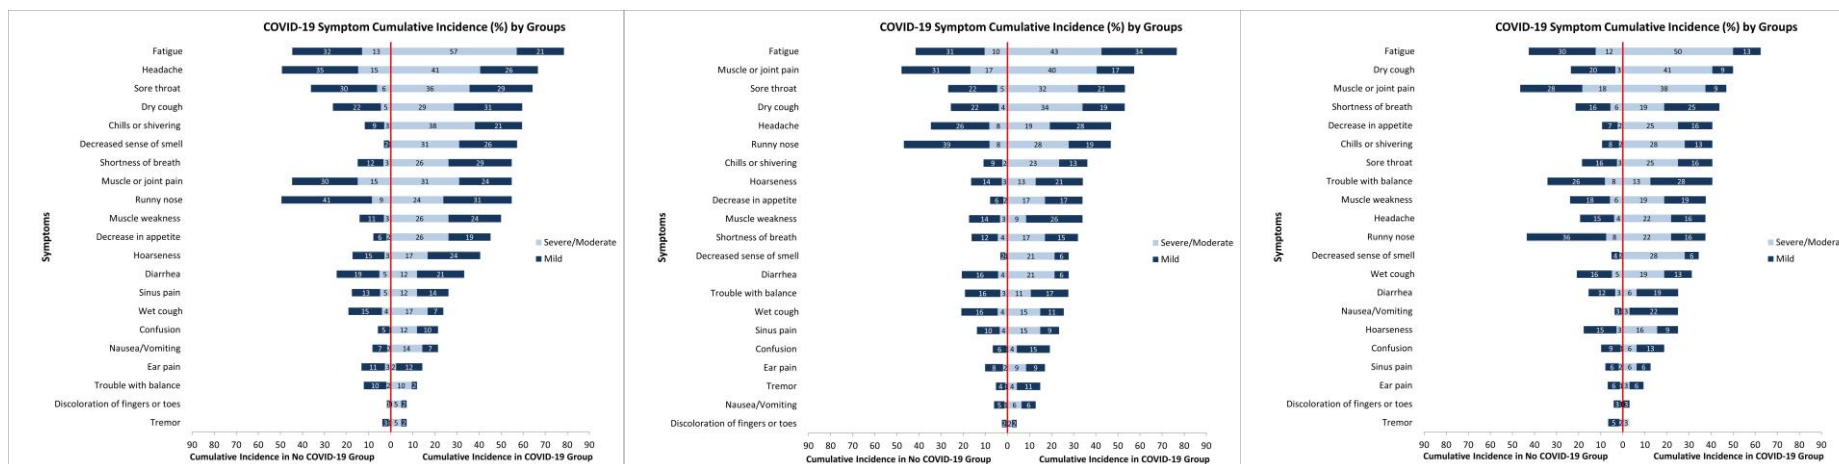





Supplementary Table 1. List of Research Ethics Boards for the Canadian Longitudinal Study on Aging

| Institution                                    | Province                  | REB                                                                                            |
|------------------------------------------------|---------------------------|------------------------------------------------------------------------------------------------|
| University of Victoria                         | British Columbia          | Human Research Ethics Office of Research Services                                              |
| Vancouver Island Health Authority (VIHA)       | British Columbia          | Island Health Research Ethics Board                                                            |
| University of British Columbia                 | British Columbia          | University of British Columbia Clinical Research Ethics Board                                  |
| Simon Fraser University                        | British Columbia          | Simon Fraser University Office of Research Ethics                                              |
| University of Calgary                          | Alberta                   | Conjoint Health Research Ethics Board (CHREB)                                                  |
| University of Manitoba                         | Manitoba                  | Bannatyne Campus Health Research Ethics Board (HREB)                                           |
| McMaster University                            | Ontario                   | Hamilton Integrated Research Ethics Board (HiREB)                                              |
| Elisabeth Bruyere Research Institute of Ottawa | Ontario                   | Bruyère Continuing Care Research Ethics Board                                                  |
| McGill University                              | Quebec                    | McGill Institutional Review Board                                                              |
| Other McGill REB                               | Quebec                    | Research Institute of the McGill University Health Centre                                      |
| Universite de Sherbrooke                       | Quebec                    | Centre de santé et des services sociaux- Institut universitaire de gériatrie de Sherbrooke (?) |
| Dalhousie University                           | Nova Scotia               | Office of Research Ethics Administration                                                       |
| PEI Health                                     | Prince Edward Island      | PEI Research Ethics Board                                                                      |
| Memorial University of Newfoundland            | Newfoundland and Labrador | Faculty of Medicine Health Research Ethics Authority                                           |

Supplementary Table 2a. Comparison of sociodemographic and health characteristics of the CLSA Baseline cohort and participants completing the COVID-19 Exit questionnaire

|                                     | BASELINE<br>(n=51,338) |       | CLSA Follow-up 1<br>(n=44,817) |       | COVID-19 EXIT<br>(n=24,114) |       |
|-------------------------------------|------------------------|-------|--------------------------------|-------|-----------------------------|-------|
|                                     | n                      | %     | n                              | %     | n                           | %     |
| <b>Age Group<sup>1</sup></b>        |                        |       |                                |       |                             |       |
| <55                                 | 13427                  | 26.15 | 6598                           | 14.72 | 890                         | 3.69  |
| 55-64                               | 16420                  | 31.98 | 14751                          | 32.91 | 7136                        | 29.59 |
| 65-74                               | 11996                  | 23.37 | 13302                          | 29.68 | 8856                        | 36.73 |
| 75+                                 | 9495                   | 18.5  | 10166                          | 22.68 | 7232                        | 29.99 |
| <b>Sex</b>                          |                        |       |                                |       |                             |       |
| Female                              | 26155                  | 50.95 | 22944                          | 51.19 | 12819                       | 53.16 |
| Male                                | 25183                  | 49.05 | 21873                          | 48.81 | 11295                       | 46.84 |
| <b>Ethnicity</b>                    |                        |       |                                |       |                             |       |
| European                            | 47105                  | 92.68 | 41273                          | 92.95 | 22439                       | 93.79 |
| Non-European                        | 3718                   | 7.32  | 3132                           | 7.05  | 1485                        | 6.21  |
| <b>Annual Household Income</b>      |                        |       |                                |       |                             |       |
| Less than \$20,000                  | 2913                   | 6.07  | 2083                           | 5.01  | 861                         | 3.80  |
| \$20,000-\$49,999                   | 12209                  | 25.42 | 9929                           | 23.89 | 4855                        | 21.45 |
| \$50,000-\$99,999                   | 17127                  | 35.66 | 15124                          | 36.39 | 8571                        | 37.87 |
| \$100,000-\$149,999                 | 8739                   | 18.20 | 7810                           | 18.79 | 4589                        | 20.27 |
| \$150,000 or more                   | 7039                   | 14.66 | 6616                           | 15.92 | 3758                        | 16.60 |
| <b>Living Situation</b>             |                        |       |                                |       |                             |       |
| Living alone                        | 11747                  | 22.89 | 10704                          | 24.35 | 5991                        | 25.33 |
| Not living alone                    | 39564                  | 77.11 | 33261                          | 75.65 | 17663                       | 74.67 |
| <b>Living Area</b>                  |                        |       |                                |       |                             |       |
| Rural                               | 9634                   | 18.77 | 6660                           | 14.87 | 4278                        | 17.84 |
| Urban                               | 41704                  | 81.23 | 38126                          | 85.13 | 19706                       | 82.16 |
| <b>Number of Chronic Conditions</b> |                        |       |                                |       |                             |       |
| 0                                   | 10288                  | 20.86 | 5246                           | 12.18 | 2794                        | 12.06 |
| 1                                   | 12733                  | 25.81 | 8560                           | 19.87 | 4775                        | 20.61 |
| 2                                   | 10686                  | 21.66 | 8970                           | 20.82 | 5064                        | 21.86 |
| 3+                                  | 15618                  | 31.66 | 20308                          | 47.14 | 10532                       | 45.47 |
| <b>Type of Alcohol Drinker</b>      |                        |       |                                |       |                             |       |
| Non-drinkers during last 12 months  | 7644                   | 14.90 | 6007                           | 13.42 | 4350                        | 18.18 |
| Binge drinker                       | 2691                   | 5.24  | 1996                           | 4.46  | 1818                        | 7.60  |
| Regular/Occasional drinker          | 40974                  | 79.81 | 36752                          | 82.12 | 17760                       | 73.65 |
| <b>Type of Smoker</b>               |                        |       |                                |       |                             |       |
| Current smoker                      | 4843                   | 9.49  | 3285                           | 7.37  | 1448                        | 6.11  |
| Former smoker                       | 30530                  | 59.80 | 27313                          | 61.3  | 14729                       | 62.15 |
| Never smoked                        | 15684                  | 30.72 | 13961                          | 31.33 | 7523                        | 31.74 |

<sup>1</sup>An average of 7 years passed between CLSA baseline and the COVID-19 exit interview

Supplementary Table 2b. Comparison of sociodemographic and health characteristics from CLSA Follow-up1 for participants who completed the COVID-19 Exit questionnaire (n=24,114) and participants who did not complete the COVID-19 Exit questionnaire (n=18,343)

|                                     | Completed COVID-19 EXIT (n=24,114) |        | Did not Complete COVID-19 Exit Survey (n=18,343) |       | Standardized Mean Difference |
|-------------------------------------|------------------------------------|--------|--------------------------------------------------|-------|------------------------------|
|                                     | n                                  | %      | n                                                | %     |                              |
| <b>Age Group</b>                    |                                    |        |                                                  |       |                              |
| <55                                 | 3,155                              | 13.16  | 3,259                                            | 18.20 | -0.139                       |
| 55-64                               | 8,314                              | 34.68  | 5,919                                            | 33.06 | 0.034                        |
| 65-74                               | 7,804                              | 32.55  | 4,678                                            | 26.13 | 0.141                        |
| 75+                                 | 4,701                              | 19.61  | 4,047                                            | 22.61 | -0.073                       |
| <b>Sex</b>                          |                                    |        |                                                  |       |                              |
| Female                              | 12,819                             | 53.16  | 8,960                                            | 48.85 | 0.086                        |
| Male                                | 11,295                             | 46.84  | 9,383                                            | 51.15 | -0.086                       |
| <b>Ethnicity</b>                    |                                    |        |                                                  |       |                              |
| European                            | 22,439                             | 93.79  | 16,612                                           | 91.58 | 0.085                        |
| Non-European                        | 1,485                              | 6.21   | 1,527                                            | 8.42  | -0.085                       |
| <b>Annual Household Income</b>      |                                    |        |                                                  |       |                              |
| Less than \$20,000                  | 861                                | 3.80   | 988                                              | 5.98  | -0.101                       |
| \$20,000-\$49,999                   | 4,855                              | 21.45  | 4,223                                            | 25.56 | -0.097                       |
| \$50,000-\$99,999                   | 8,571                              | 37.87  | 5,702                                            | 34.51 | 0.070                        |
| \$100,000-\$149,999                 | 4,589                              | 20.27  | 2,933                                            | 17.75 | 0.075                        |
| \$150,000 or more                   | 3,758                              | 16.6   | 2,676                                            | 16.2  | 0.011                        |
| <b>Living Situation</b>             |                                    |        |                                                  |       |                              |
| Living alone                        | 5,599                              | 23.41  | 4,261                                            | 24.04 | -0.015                       |
| Not living alone                    | 18,323                             | 76.59  | 13,460                                           | 75.96 | 0.015                        |
| <b>Living Area</b>                  |                                    |        |                                                  |       |                              |
| Rural                               | 3,309                              | 13.81  | 2,926                                            | 16.36 | -0.071                       |
| Urban                               | 20,649                             | 86.19  | 14,964                                           | 83.64 | 0.071                        |
| <b>Number of Chronic Conditions</b> |                                    |        |                                                  |       |                              |
| 0                                   | 2,794                              | 12.06  | 2,318                                            | 13.41 | -0.041                       |
| 1                                   | 4,775                              | 20.61  | 3,468                                            | 20.07 | 0.014                        |
| 2                                   | 5,064                              | 21.86  | 3,524                                            | 20.39 | 0.036                        |
| 3+                                  | 10,532                             | 45.47  | 7,970                                            | 46.12 | -0.013                       |
| <b>Type of Alcohol Drinker</b>      |                                    |        |                                                  |       |                              |
| Non-drinkers during last 12 mo.     | 2,777                              | 11.6   | 2,586                                            | 14.47 | -0.085                       |
| Binge drinker                       | 968                                | 4.04   | 926                                              | 5.18  | -0.054                       |
| Regular/Occasional drinker          | 20,202                             | 84.36  | 14,364                                           | 80.35 | 0.105                        |
| <b>Type of Smoker</b>               |                                    |        |                                                  |       |                              |
| Current smoker                      | 1,387                              | 5.82%  | 1837                                             | 8.81  | -0.119                       |
| Former smoker                       | 14,787                             | 62.05% | 12584                                            | 60.33 | 0.041                        |
| Never smoked                        | 7,656                              | 32.13% | 6438                                             | 30.86 | 0.024                        |



Supplementary Table 3. Average number of questionnaires (0-6) on which a symptom was reported by persistence status (>1 month) at exit survey (n=121)

| Symptom <sup>1</sup>     | Not Persistent >1 m |             | Persistent >1 m |             | P-value |
|--------------------------|---------------------|-------------|-----------------|-------------|---------|
|                          | n                   | mean (SD)   | n               | mean (SD)   |         |
| Fatigue                  | 81                  | 1.75 (1.79) | 38              | 3.87 (1.96) | <0.001  |
| Dry cough                | 94                  | 1.09 (1.34) | 25              | 3.20 (2.24) | <0.001  |
| Muscle or joint pain     | 96                  | 1.69 (1.70) | 23              | 3.57 (1.97) | <0.001  |
| Sore throat              | 104                 | 1.06 (1.32) | 12              | 2.75 (2.09) | <0.001  |
| Headache                 | 106                 | 1.37 (1.63) | 11              | 3.00 (2.19) | 0.003   |
| Runny nose               | 96                  | 1.43 (1.48) | 21              | 3.57 (1.57) | <0.001  |
| Chills or shivering      | 115                 | 0.56 (0.85) | 5               | 2.60 (2.41) | <0.001  |
| Shortness of breath      | 94                  | 0.65 (1.37) | 26              | 3.04 (1.75) | <0.001  |
| Decreased sense of smell | 97                  | 0.47 (1.04) | 21              | 2.19 (2.25) | <0.001  |
| Decrease in appetite     | 106                 | 0.63 (0.82) | 13              | 1.92 (1.93) | <0.001  |
| Hoarseness               | 104                 | 0.93 (1.61) | 7               | 3.71 (1.98) | <0.001  |
| Diarrhea                 | 112                 | 0.75 (1.30) | 8               | 4.62 (1.69) | <0.001  |
| Wet cough                | 103                 | 0.56 (1.19) | 15              | 3.80 (1.86) | <0.001  |
| Sinus pain               | 114                 | 0.53 (1.07) | 6               | 1.50 (2.51) | 0.048   |
| Confusion                | 110                 | 0.25 (0.78) | 8               | 3.38 (2.13) | <0.001  |
| Nausea/Vomiting          | 118                 | 0.38 (0.65) | 3               | 4.33 (2.89) | <0.001  |
| Ear pain                 | 114                 | 0.51 (1.03) | 5               | 1.80 (1.10) | 0.007   |

<sup>1</sup> Muscle weakness, tremor, trouble with balance, and discoloration of fingers and toes were not included because they were added after the baseline questionnaire

Supplementary Table 4. Other Symptoms Reported Beyond the Prespecified List of 23 by Participants with a Positive COVID-19 Test or Physician Diagnosis of COVID-19

| <b>Symptom Category</b> | <b>Symptom Description</b>                                                                                |
|-------------------------|-----------------------------------------------------------------------------------------------------------|
| Cardiac                 | Cardiac ischemia                                                                                          |
| Cardiac                 | Stiffening of heart muscle                                                                                |
| Cardiac                 | CAS - Coronary Arterial Spasms, Heart Attack                                                              |
| Cardiac                 | Hypertension                                                                                              |
| Cognitive               | Short term memory seems to be weak.                                                                       |
| Dermatologic            | Skin rash on back                                                                                         |
| Dermatologic            | Red skin spots                                                                                            |
| Lower Respiratory       | Minor pneumothoraxes - bleb releases, increase in lung cysts                                              |
| Neurological            | Continuous Tingling in arms and legs for 10 weeks then intermittently for 4 months gradually disappearing |
| Neurological            | Pain and tingling on edge of feet                                                                         |
| Neurological            | Leg numbness                                                                                              |
| Neurological            | prickly skin sensation on fore arms (like a rash)                                                         |
| Other                   | feeling of burning in the thorax                                                                          |

Supplementary Table 5. Detailed Step-wise Results for Multivariable Negative Binomial Regression Analysis Assessing Factors Associated with >1 Month and >3 Month Symptom Persistence in Participants with a Positive COVID-19 Test or Physician Diagnosis

| Factors                                                                                    | AIC    | Factors                                                                                                              | AIC    |
|--------------------------------------------------------------------------------------------|--------|----------------------------------------------------------------------------------------------------------------------|--------|
| <b>Outcome: persistent symptoms &gt;1 month</b>                                            |        | <b>Outcome: persistent symptoms &gt;3 month</b>                                                                      |        |
| <b>Step 1</b>                                                                              |        | <b>Step 1</b>                                                                                                        |        |
| Age Group (ref: <65 years) + Sex (ref: Female)                                             | 474.30 | Age Group (ref: <65 years) + Sex (ref: Female)                                                                       | 369.88 |
| +Number of Chronic Conditions (ref:0 or 1)                                                 | 473.93 | +Number of Chronic Conditions (ref:0 or 1)                                                                           | 369.03 |
| +Any Depression or Anxiety (ref: No)                                                       | 475.43 | +Any Depression or Anxiety (ref: No)                                                                                 | 371.78 |
| +Any Mobility ADL difficulty (ref: No)                                                     | 476.18 | +Any Mobility ADL difficulty (ref: No)                                                                               | 369.26 |
| +Subjective social status                                                                  | 476.30 | +Subjective social status                                                                                            | 368.61 |
| <b>Step 2</b>                                                                              |        | <b>Step 2</b>                                                                                                        |        |
| Age Group (ref: <65 years) + Sex (ref: Female) + Number of Chronic Conditions (ref:0 or 1) | 473.93 | Age Group (ref: <65 years) + Sex (ref: Female) + Subjective social status                                            | 368.61 |
| +Any Depression or Anxiety (ref: No)                                                       | 474.80 | + Number of Chronic Conditions (ref:0 or 1)                                                                          | 367.50 |
| +Any Mobility ADL difficulty (ref: No)                                                     | 475.84 | +Any Mobility ADL difficulty (ref: No)                                                                               | 369.01 |
| +Subjective social status                                                                  | 475.92 | +Any Depression or Anxiety (ref: No)                                                                                 | 370.60 |
| -Number of Chronic Conditions (ref:0 or 1)                                                 | 474.30 | -Subjective social status                                                                                            | 369.88 |
|                                                                                            |        | <b>Step 3</b>                                                                                                        |        |
|                                                                                            |        | Age Group (ref: <65 years) + Sex (ref: Female) + Subjective social status+ Number of Chronic Conditions (ref:0 or 1) | 367.50 |
|                                                                                            |        | - Number of Chronic Conditions (ref:0 or 1)                                                                          | 368.61 |
|                                                                                            |        | -Subjective social status                                                                                            | 369.03 |
|                                                                                            |        | +Any Mobility ADL difficulty (ref: No)                                                                               | 368.32 |
|                                                                                            |        | +Any Depression or Anxiety (ref: No)                                                                                 | 369.48 |

Supplementary Table 6. Multivariable Negative Binomial Regression Analysis Results Assessing Factors Associated with >1 Month and >3 Month Symptom Persistence in Participants with a Positive COVID-19 Test or Physician Diagnosis using 5 Imputation Datasets

| Factors                                   | Any persistent symptoms >1 month |         | Any persistent symptoms >3 month |         |
|-------------------------------------------|----------------------------------|---------|----------------------------------|---------|
|                                           | aIRR (95% CI)                    | p-value | aIRR (95% CI)                    | p-value |
| Age Group (ref: <65 years)                |                                  |         |                                  |         |
| 65-74                                     | 0.69 (0.40, 1.18)                | 0.151   | 1.23 (0.65, 2.32)                | 0.713   |
| 75+                                       | 0.65 (0.35, 1.21)                |         | 0.83 (0.40, 1.72)                |         |
| Female Sex                                | 1.64 (1.01, 2.68)                | 0.048   | 1.43 (0.81, 2.54)                | 0.220   |
| Number of Chronic Conditions (ref:0 or 1) |                                  |         |                                  |         |
| 2 or more                                 | 1.85 (0.99, 3.44)                | 0.051   | 2.15 (1.04, 4.45)                | 0.039   |
| Any Depression or Anxiety (ref: No)       |                                  |         |                                  |         |
| Subjective social status (1 rung)         |                                  |         | 0.85 (0.75, 0.98)                | 0.025   |
| Any Mobility ADL difficulty (ref: No)     |                                  |         |                                  |         |

<sup>1</sup>COVID-19 Status based on self-reported positive COVID-19 test, physician diagnosis.

Supplementary Table 7. Multivariable Negative Binomial Regression Analysis Results Assessing Factors Associated with >1 Month and >3 Month Symptom Persistence in Participants with a Positive COVID-19 Test or Physician Diagnosis (n=121) OR who indicating they “very likely” had COVID-19 and had seroprevalence results indicating that they had COVID-19 antibodies and were not vaccinated (n=15)

| Factors                                              | Univariate        |         | Multivariable     |         |
|------------------------------------------------------|-------------------|---------|-------------------|---------|
|                                                      | IRR (95% CI)      | p-value | IRR (95% CI)      | p-value |
| <b>Outcome: Any persistent symptoms &gt;1 month</b>  |                   |         |                   |         |
| Age Group (ref: <65 years)                           |                   |         |                   |         |
| 65-74                                                | 0.78 (0.46, 1.33) | 0.655   | 0.68 (0.40, 1.13) | 0.295   |
| 75+                                                  | 0.87 (0.48, 1.58) |         | 0.71 (0.39, 1.31) |         |
| Female Sex                                           | 1.61 (1.01, 2.56) | 0.043   | 1.61 (1.01, 2.54) | 0.042   |
| Number of Chronic Conditions (ref:0 or 1)            |                   |         |                   |         |
| 2 or more                                            | 2.00 (1.12, 3.50) | 0.016   | 2.13 (1.18, 3.80) | 0.011   |
| Any Depression or Anxiety (ref: No)                  | 0.98 (0.61, 1.62) | 0.950   |                   |         |
| Subjective social status (1 rung)                    | 0.96 (0.85, 1.07) | 0.468   |                   |         |
| Any Mobility ADL difficulty (ref: No)                | 1.39 (0.83, 2.43) | 0.227   |                   |         |
| <b>Outcome: Any persistent symptoms &gt;3 months</b> |                   |         |                   |         |
| Age Group (ref: <65 years)                           |                   |         |                   |         |
| 65-74                                                | 1.22 (0.66, 2.26) | 0.785   | 1.01 (0.56, 1.83) | 0.909   |
| 75+                                                  | 1.03 (0.51, 2.10) |         | 0.88 (0.43, 1.79) |         |
| Female Sex                                           | 1.87 (1.09, 3.20) | 0.022   | 1.41 (0.80, 2.47) | 0.214   |
| Number of Chronic Conditions (ref:0 or 1)            |                   |         |                   |         |
| 2 or more                                            | 2.28 (1.15, 4.44) | 0.016   | 2.13 (1.07, 4.23) | 0.033   |
| Any Depression or Anxiety (ref: No)                  | 1.29 (0.74, 2.28) | 0.372   |                   |         |
| Subjective social status (1 rung)                    | 0.84 (0.73, 0.96) | 0.008   | 0.87 (0.75, 0.99) | 0.040   |
| Any Mobility ADL difficulty (ref: No)                | 1.89 (1.06, 3.05) | 0.035   |                   |         |

*Rationale for use of seroprevalence results as a sensitivity analysis:* A seroprevalence study in the CLSA was conducted between November 12, 2020-August 31, 2021. There are a number of reasons that we chose not to use seroprevalence information to characterize our population in this study as COVID-19 positive. The self-reported COVID-19 status and persistent symptom data were collected from the beginning of the pandemic until COVID-19 exit survey completion (September-December 2020). While some people with COVID-19 would still have antibodies at the time of the seroprevalence study, it has been shown that the antibodies decrease significantly by 4 months post infection ([DOI: 10.1126/sciimmunol.abe0367](https://doi.org/10.1126/sciimmunol.abe0367)) and thus there would be many false negatives. As well a definitive “COVID-19 infection” positive was not possible in people who were vaccinated. In Canada, over 90% of the population 50 years and older had their first vaccination by mid-May. Although we acknowledge that there will be some misclassification with self-reported COVID-19 status, we feel that because a positive COVID-19 test or physician diagnosis was such a salient event in the first year of the pandemic that recall bias will be minimal.

As a sensitivity analysis used the seroprevalence results to increase our sample size for our persistent symptom regression analysis by including the subgroup of participants who said it was very likely that they had COVID but did not report a positive test or physician diagnosis (excluded from our primary analyses) who also had a positive seroprevalence results and were not yet vaccinated.
